# Supplementary material
Source: Springer Nature journal article supplement (https://www.springermedizin.de/resource/supplementary/12960_2013_455_MOESM2_ESM.docx/9570120)
Supplement: MOESM2 [file 9570120]

Table 8: Numbers of doctors per 100,000 citizens in 12 new EU-countries

Source: WHO; World Health Statistics; 2007.

| Country | Total number of doctors | Number of doctors per 100.000 citizens |
| --- | --- | --- |
| Bulgaria[[1]](#footnote-1) | 28,128 | 56 |
| Cyprus | 1,864 | 234 |
| Czech Republic | 35,960 | 351 |
| Estonia | 6,118 | 448 |
| Latvia | 6,940 | 301 |
| Lithuania | 13,682 | 397 |
| Hungary | 32,877 | 333 |
| Malta | 1,254 | 318 |
| Poland | 95,272 | 247 |
| Romania | 42,538 | 190 |
| Slovakia | 17,172 | 318 |
| Slovenia | 4,475 | 225 |

1. Bulgaria and Romania joined the European Union on 1 January 2007. The other 10 countries joined the EU on 1 May 2004. [↑](#footnote-ref-1)
